# Supplementary material for: Incubation period of typhoidal salmonellosis: a systematic review and meta-analysis of outbreaks and experimental studies occurring over the last century
Source: BMC Infect Dis. 2018 Sep 27;18:483. doi: 10.1186/s12879-018-3391-3 (PMC6161394; doi:10.1186/s12879-018-3391-3)
Supplement: Supplementary file 2 — List of included studies and data. Spreadsheet containing a list of studies included in the review and the data extracted from the studies. (XLSX 14 kb) [file 12879_2018_3391_MOESM2_ESM.xlsx]

## Sheet: Sheet1
	GENERAL INFORMATION					STUDY CHARACTERISTICS									ORGANISM CHARACTERISTICS		OUTCOME MEASURES										DATA FROM EPI CURVE					RAW INCUBATION PERIOD DATA (days)
Study number	Year of publication	Title	Authors	Publication type	PMID	Year of study	Study design	Exposure	Diagnosis	Accuracy	Ascetainment	QS	Country	Age Distrinbution	Organism	Subtype	No. exposed	No. affected	Transmission	Setting	Food vehicle	Food category	Mean incubation period	Median incubation period	Modal incubation period	Range incubation period	Source of data	Mean incubation period	Median incubation period	Modal incubation period	Range incubation period	0	1	2	3	4	5	6	7	8	9	10	11	12	13	14	15	16	17
Study 1	2012	Risk factors for typhoid outbreak in Sungai Congkak Recreational Park, Selangor 2009	Anita S et al	Journal	22582542	2009	Case control	3	3	3	1		Malaysia	<12 years	S typhi			12	Environmental	Outdoor activity	NA	Non food		18		4 - 20 days	Epicurve	16.5	18	18	3 - 21d	0	0	0	1	0	0	1	0	0	0	0	0	0	0	0	1	0	0
Study 2	1961	Typhoid fever epidemic following a wedding reception	Caraway & Bruce	Journal	13690681	1960	Cohort	3	3	3	2		USA	0 65y	S typhi	E1	98	31	FB	catered meal	sandwiches	other	21 d			7 - 34 d	Epicurve	20.9	20	16	7 - 34d	0	0	0	0	0	0	0	1	0	0	0	0	2	0	1	1	4	1
Study 3	1995	Typhoid fever in the park: epidemiology of an outbreak at a cultural interface	Coté TR et al	Journal	8568020	1990	Case control	3	3	2	2		USA	2m - 55y	S typhi		60	24	FB	Picnic	Potato Salad	Salad & vegetable		16		6 - 29 days	Epicurve	14	14	14	1 - 28d	0	1	0	0	0	0	0	7	0	0	0	0	0	0	9	0	0	0
Study 4	2016	An Outbreak of Food-Borne Typhoid Fever Due to Salmonella enterica Serotype Typhi in Japan Reported for the First Time in 16 Years	Kobayashi T et al	Journal	26621565	2014	Descriptive	2	3	2	2		Japan	5 - 47y	S typhi			7	FB	Restaurant	NK	NK	17.4d			10 - 27 days	Description	17.4	17	19	10 - 27d	0	0	0	0	0	0	0	0	0	0	1	0	0	0	1	0	1	1
Study 5	2005	Outbreak of typhoid fever in vaccinated members of the French Armed Forces in the Ivory Coast	Michel R et al	Journal		2001	R Cohort	3	3	3	3		Ivory Coast	ave 25.9y	S typhi		94	24	FB	Outdoor activity	Cucumber saladSalad	Salad & vegetable					Epicurve	21.4	23	24	9 - 34d	0	0	0	0	0	0	0	0	0	2	0	0	0	1	1	0	2	0
Study 6	1983	Incubation period and other features of food-borne and water-borne outbreaks of typhoid fever in relation to pathogenesis and genetics of resistance	Naylor GR	Journal	6132187		Experimental	3	3	3	3			18-50y	S typhi		672	235	FB	Experimental	Milk	Dairy					Epicurve	11.4	9	7	3 - 41d	0	0	0	1	1	3	11	18	16	16	12	4	1	1	2	1	1	0
Study 7	1980	Typhoid fever: A report on a point-source outbreak of 69 cases in Cape Town	Popkiss ME	Journal	7355351	1978	case control	3	3	2	1		SA	av 23.3y	S typhi	PT 46	106	69	FB	catered meal	NK	NK	20.6d
Study 8	2000	Outbreak of typhoid fever on the French Riviera	Pradier C et al	Journal	10947223	1997	Case control	3	3	2	2		France		S typhi	H atypical	350	26	FB	catered meal	pork meat	Red meat					Epicurve	17.7	17	16	9 - 33d	0	0	0	0	0	0	0	0	0	2	1	2	1	0	0	0	5	3
Study 9	1926	An epidemic of typhoid fever following a church dinner	Ramsey G et al	Journal	18011971	1925	Cohort	3		3	3		USA	All ages	S typhi		250	35	FB	catered meal	Squash	Salad & vegetable	31.3d			2 - 42 days	Summary table	14.7	13	10	2 - 41d	0	0	1	0	0	0	1	3	1	1	4	2	1	4	2	1	2	1
Study 10	1914	Ninety-three persons infected by a typhoid carrier at a public dinner	Sawyer WA	Journal		1914	Descriptive	2	2	2	2		USA	1y - 65y	S typhi		150	84	FB	catered meal	Spanish spaghetti	other				3 - 29d	Epicurve	10.5	8	7	4 - 29d	0	0	0	1	3	12	19	13	7	2	2	5	2	0	2	3	2	1
Study 11	2014	An Outpatient, Ambulant-Design, Controlled Human Infection Model Using Escalating Doses of Salmonella Typhi Challenge Delivered in Sodium Bicarbonate Solution	Waddington C et al	Journal		2011	Experimental						UK	18 - 60y	S typhi		40	24	FB	Experimental	NaHCo	other		8
Study 12	1950	Typhoid fever, with particular reference to the Crowthorne epidemic, 1949.	Moore WB	Journal		1949	Descriptive	3	3	3	2		UK	All ages	S typhi		56	41	FB	community	corned beef	Red meat				8 - 21 days	Description	9.1	9	9	6 - 21d	0	0	0	0	0	0	6	4	8	9	4	3	1	4	0	0	0	1
Study 13	1917	An epidemic resulting from the contamination of ice cream by a typhoid carrier	Cumming JG	Journal		1916	Descriptive	2	2	1	1		USA	NK	S typhi		29	23	FB	Picnic	Ice cream	Dairy	8 d			5 - 12 days	Summary	7	7	6	5 - 12d	0	0	0	0	0	4	7	7	1	1	1	1	1	0	0	0	0	0
[truncated: 28 more columns]
